# Supplementary material
Source: PubMed Central journal article supplement (PMC3679485)
Supplement: supp_126.11.2411_JCS117473.pdf [file supp_126.11.2411_JCS117473.pdf]

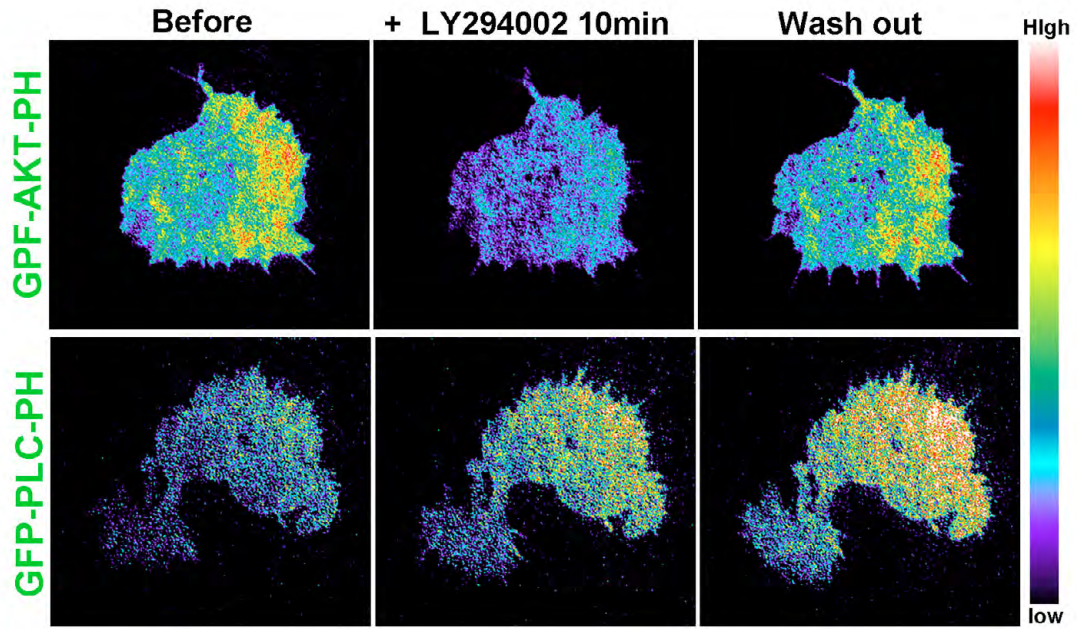

**Fig. S1. PI3K inhibitor (LY294002) decreases  $PIP_3$ , but increases  $PIP_2$  levels.** Pseudocolored images of a stage 1 cortical neurons transfected with GFP-AKT-PH ( $PIP_3$  label) or GFP-PLC-PH ( $PIP_2$  label) before, after 10 minutes of LY294002 (10  $\mu$ M) treatment and after washout.

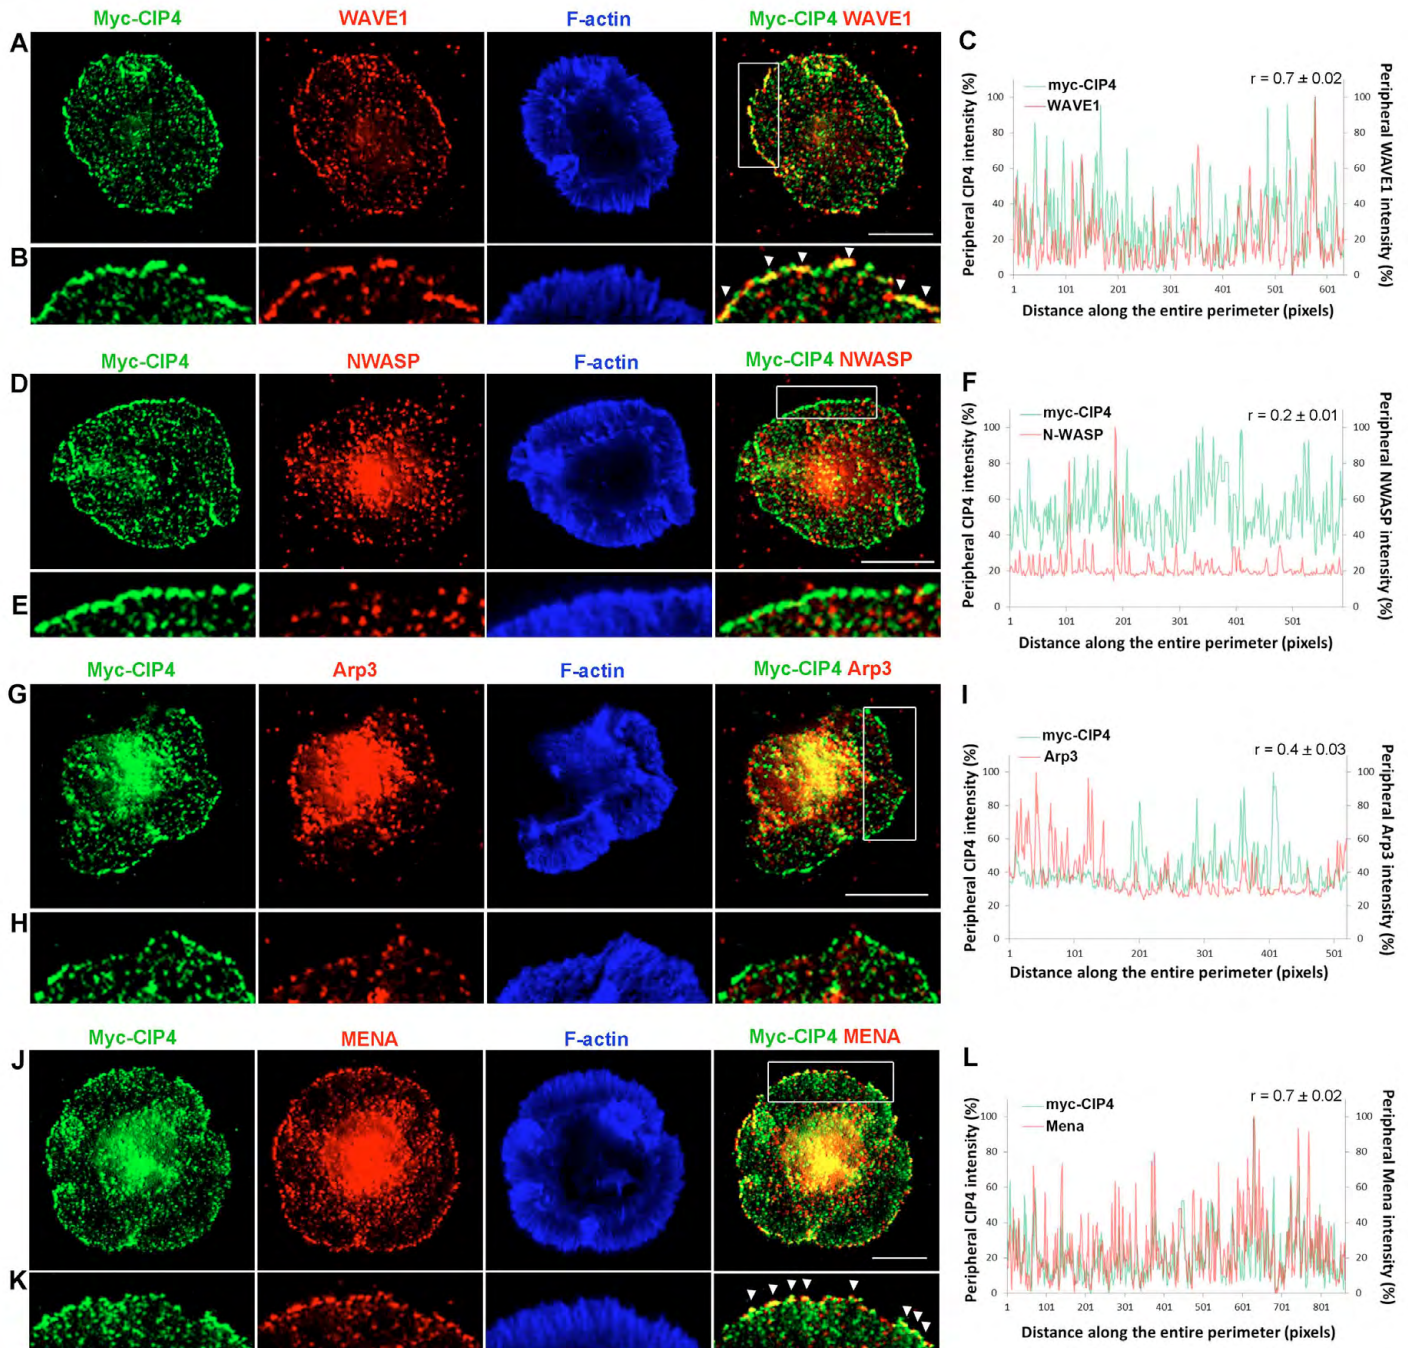

**Fig. S2. CIP4 co-localizes with endogenous WAVE1 and Mena but not N-WASP or Arp3 in cortical neurons.** (A, D, G, J) Images of stage 1 cortical neurons transfected with myc-CIP4, fixed after 1DIV and stained with anti-myc antibody (green), and anti-WAVE1 (A), anti-N-WASP (D), anti-Arp3 (G) or anti-Mena antibody (J) (red) and phalloidin 670 (blue). (B, E, H, K) Images magnified from boxes in A, D, G and J showing that CIP4 co-localizes with endogenous WAVE1 (B) and Mena (K) but not with endogenous N-WASP (E) and Arp3 (H) at the peripheral membrane. (C, F, I, L) Representative graphs showing the normalized intensity of CIP4 (red) and WAVE1 (C), N-WASP (F), Arp3 (I) or Mena (L) (all green) at the peripheral membrane of neurons shown in A, D, G and J. White arrowheads indicate co-localization of CIP4 and WAVE1 (B) or Mena (K). Numbers above the graphs indicate the average Pearson's correlation coefficient ( $n = 19, 6, 7$  and  $9$  neurons for C, F, I, and L, respectively). Scale bars,  $10 \mu\text{m}$ .

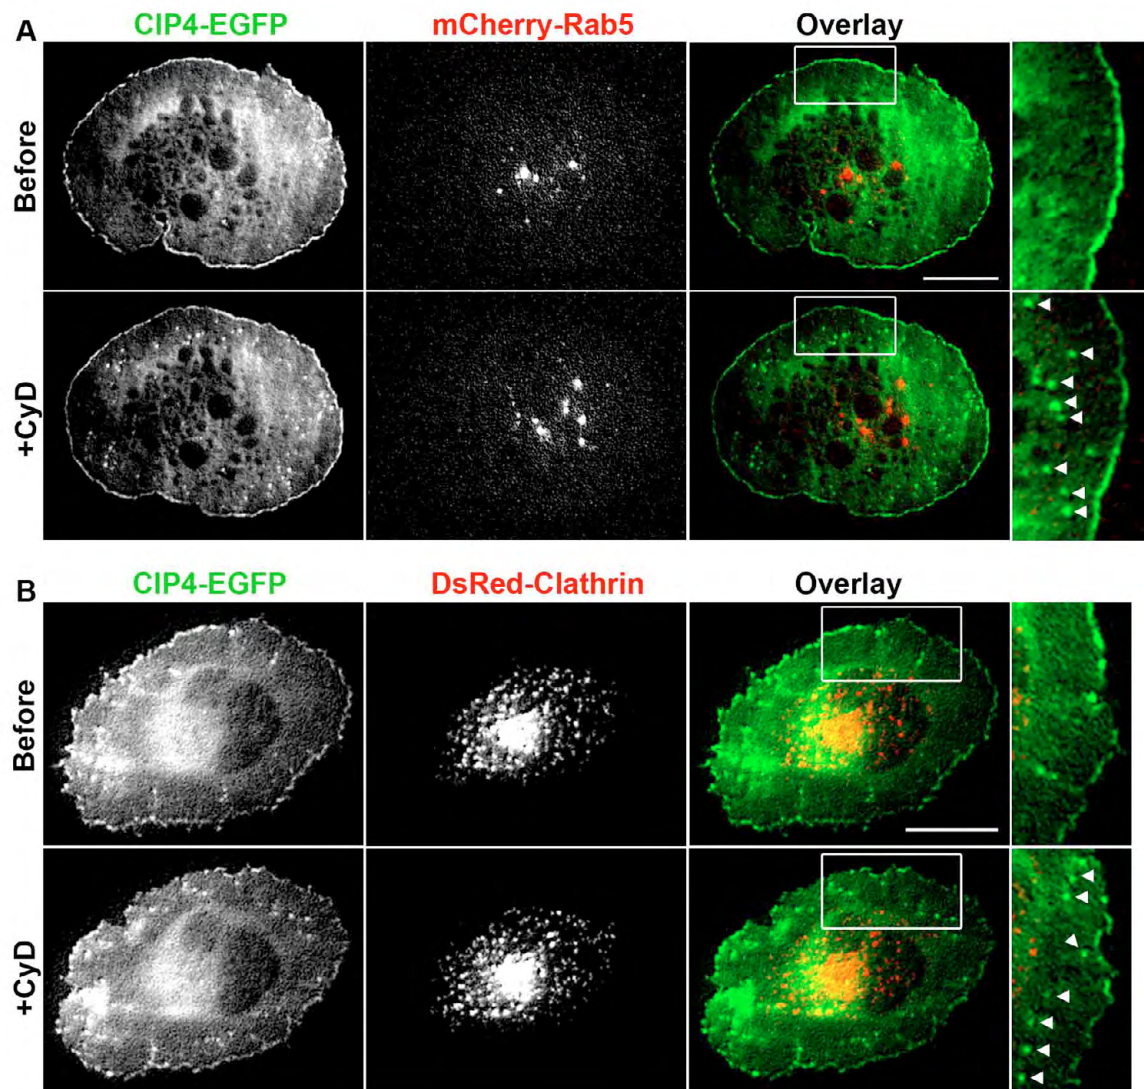

**Fig. S3. CIP4 puncta that developed after cytochalasin D treatment do not overlap with Rab5 or Clathrin.** (A, B) Images of a living stage 1 cortical neuron co-transfected with CIP4-EGFP and mCherry-Rab5 (A) or DsRed-Clathrin (B) before and after Cytochalasin D (CyD) treatment (100nM). White arrowheads indicate CIP4 puncta moving retrogradely, away from the membrane edge. Scale bars, 10  $\mu$ m.

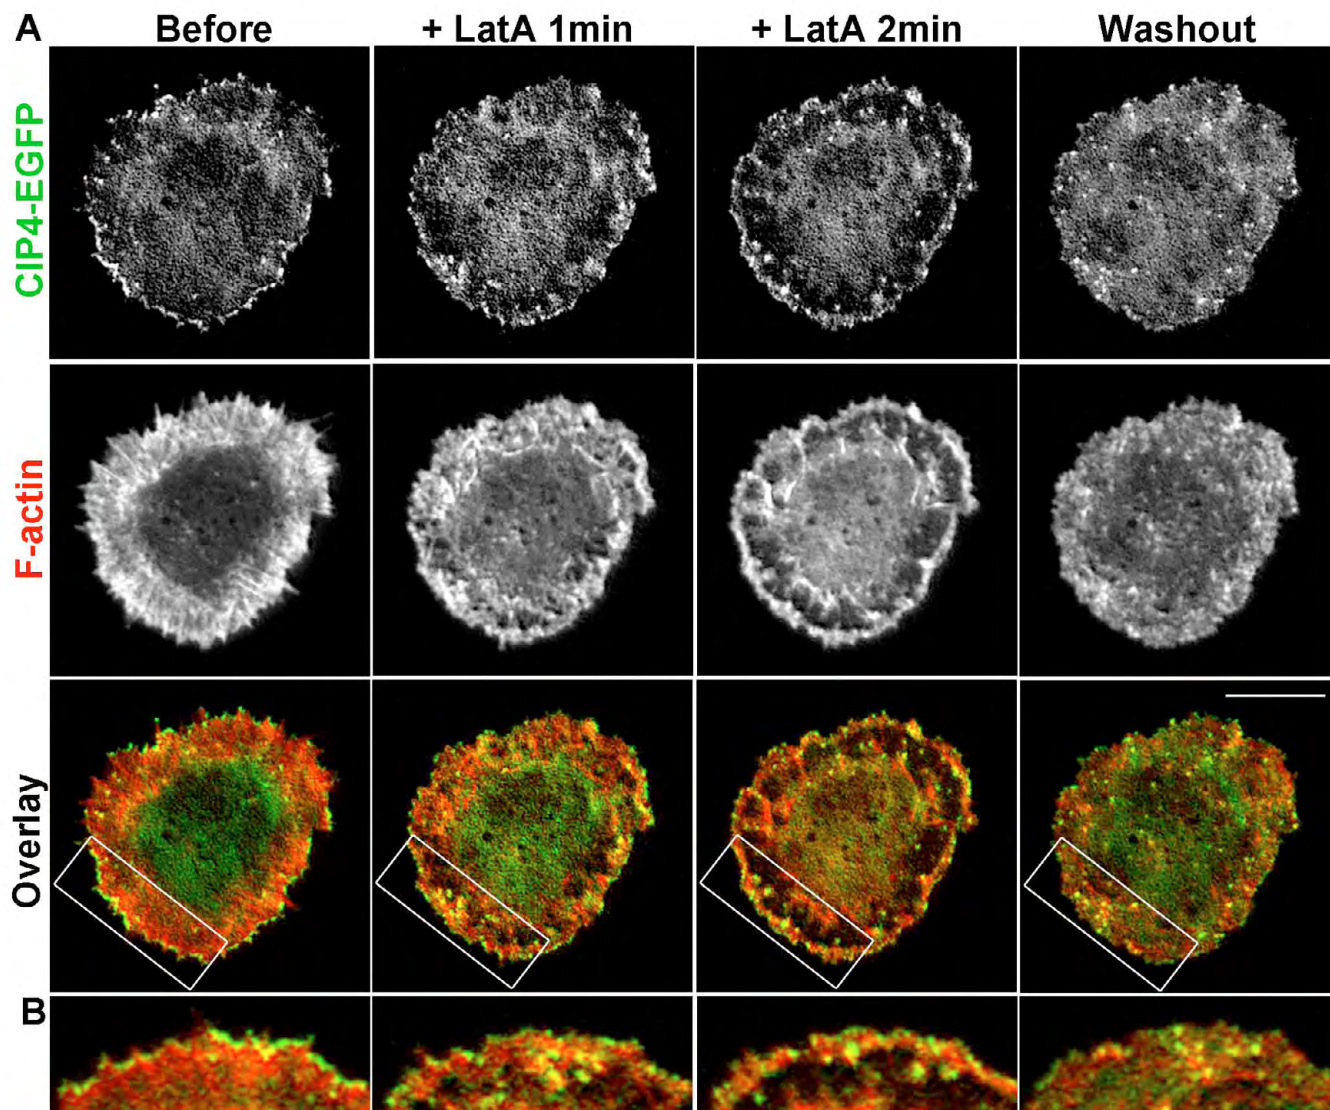

**Fig. S4. Latrunculin A does not induce membrane tubulation in CIP4 expressing neurons.** (A) Image of a stage 1 cortical neuron transfected with CIP4-EGFP and tdTomato-F-tractin before Latrunculin A (LatA) treatment ( $1\mu\text{M}$ ), one and two minutes after LatA treatment and after washout. (B) Images magnified from boxes in A showing CIP4 at the peripheral area. Scale bars,  $10\mu\text{m}$ .

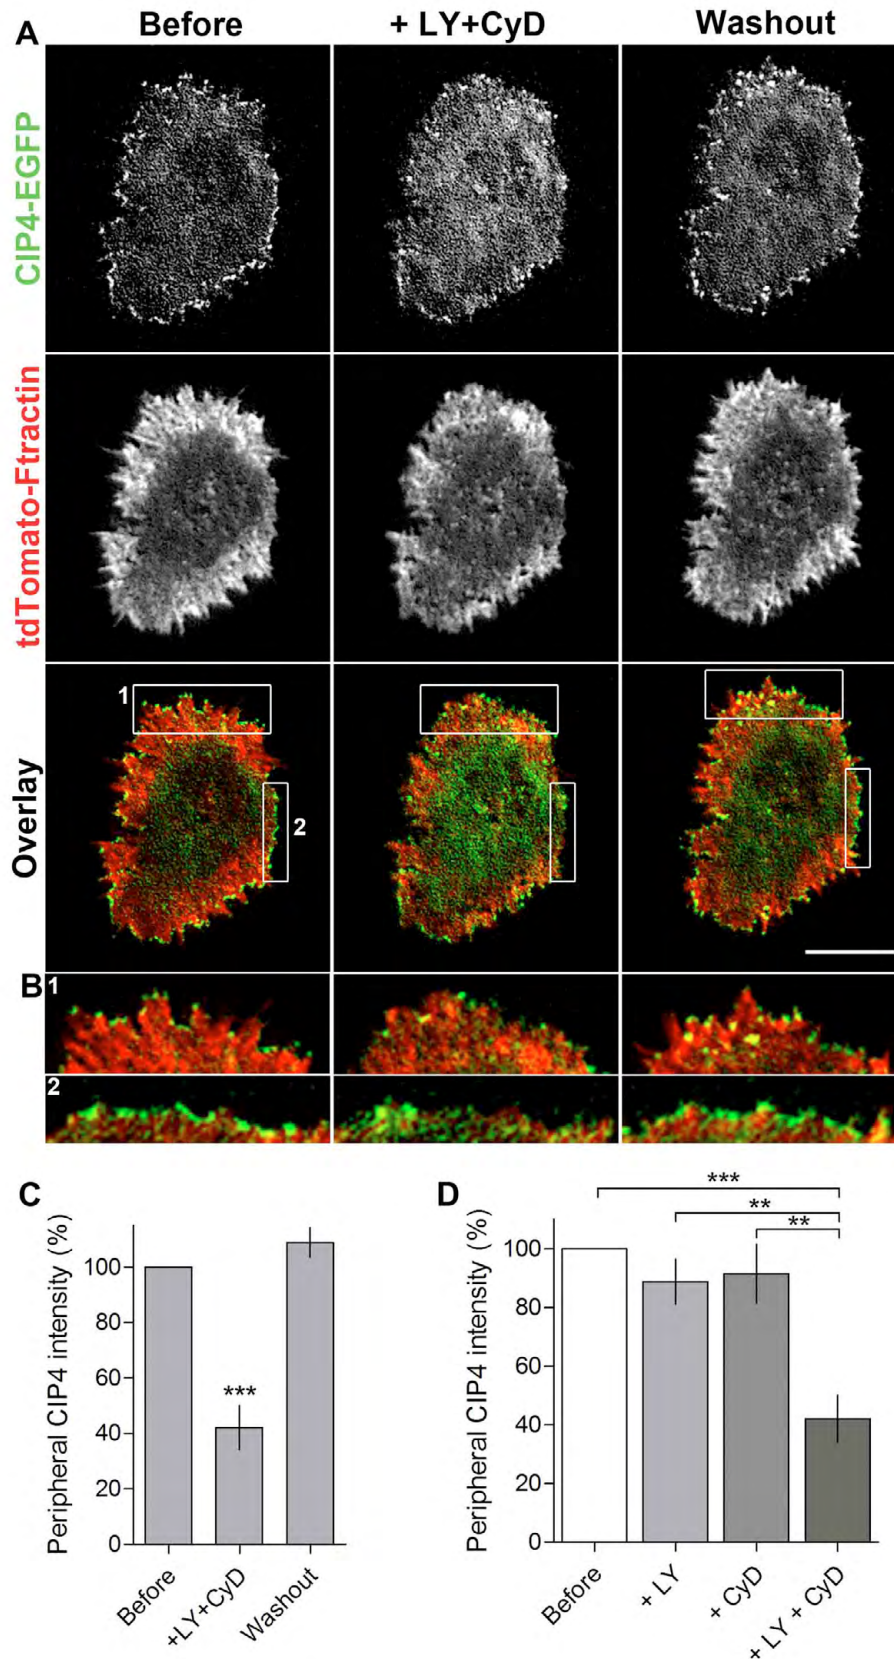

**Fig. S5. PI3K inhibitor and CyD synergistically reduce CIP4 from the protruding edge.** (A) Image of a stage 1 cortical neuron transfected with CIP4-EGFP and tdTomato-F-tractin before and after LY294002 (LY) + Cytochalasin D (CyD) treatment. (B) Images magnified from boxes in A showing CIP4 at the peripheral area. (C) Bar graph of average intensity of CIP4 at the peripheral membrane of the cells in CIP4 transfected neurons before, after 1 minute of LY294002 (LY) + Cytochalasin D (CyD) treatment and after washout. (D) Bar graph shows comparison of the effect of LY alone, CyD alone and LY+CyD on CIP4 intensity at the peripheral membrane after 1 minute treatment ( $n=6, 5$  and  $4$  cells, respectively from three independent experiments). Data are expressed as mean  $\pm$  SEM. \*\*,  $P < 0.01$  and \*\*\*,  $P < 0.001$  compared with before treatment (One-way ANOVA with Dunnett's (C) or Bonferroni (D) post-test comparison) ( $n=4$  cells from three independent experiments). Scale bars,  $10 \mu\text{m}$ .

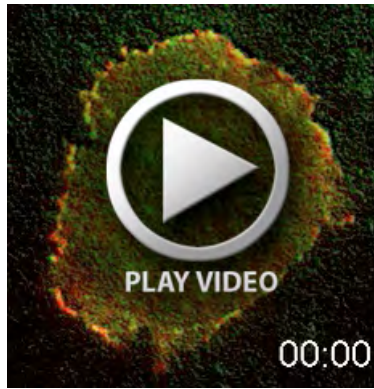

**Movie 1. CIP4 co-localizes with WAVE1 in neurons.** A movie of a stage1 cortical neuron transfected with GFP-WAVE1 (green) and CIP4-tdTomato (red) (related to Fig. 3) and imaged in TIRFM. Images captured every 2 seconds. Scale bar, 10  $\mu$ m.

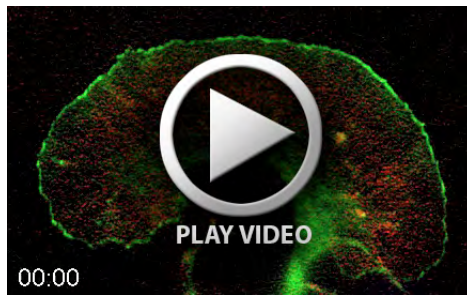

**Movie 2. Cytochalasin D affects CIP4 distribution in neurons.** A movie of a lamellipodial growth cone from a cortical neuron transfected with CIP4-EGFP (green) and mRuby-lifeact (red) (related to Fig. 5) and imaged in TIRFM. Note that upon cytochalasin D treatment CIP4 redistributes from the protruding edge to internal puncta that move retrogradely in actin flow. Those puncta then form an actin comet tail after the cytochalasin D washout. Images captured every 6 seconds. Scale bar, 10  $\mu$ m.

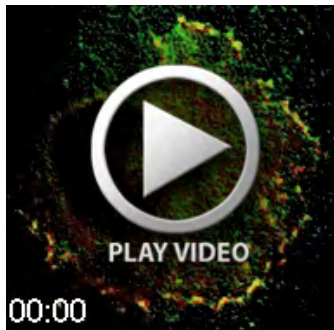

**Movie 3. CIP4 co-localizes with DAAM1 in neurons.** A movie of a stage1 cortical neuron transfected with GFP-DAAM1 (green) and CIP4-tdTomato (red) (related to Fig. 6A-C) and imaged in TIRFM. Images captured every 2 seconds. Scale bar, 10  $\mu$ m.

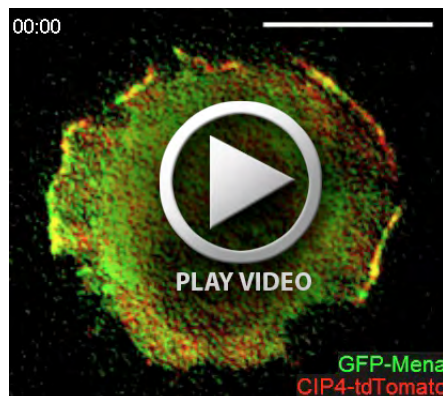

**Movie 4. CIP4 co-localizes with Mena in neurons.** A movie of a stage1 cortical neuron transfected with GFP-Mena (green) and CIP4-tdTomato (red) (related to Fig. 6G-I) and imaged in TIRFM. Images captured every 2 seconds. Scale bar, 10  $\mu$ m.
